# Supplementary material
Source: Springer Nature journal article supplement (https://www.springermedizin.de/resource/supplementary/13256_2010_1696_MOESM3_ESM.pdf/9648190)
Supplement: MOESM3 [file 9648190]

73 bpm  
159/102 mmHg

RECUPER.  
5:53

BRUCE  
0.0 km/h  
0.0%

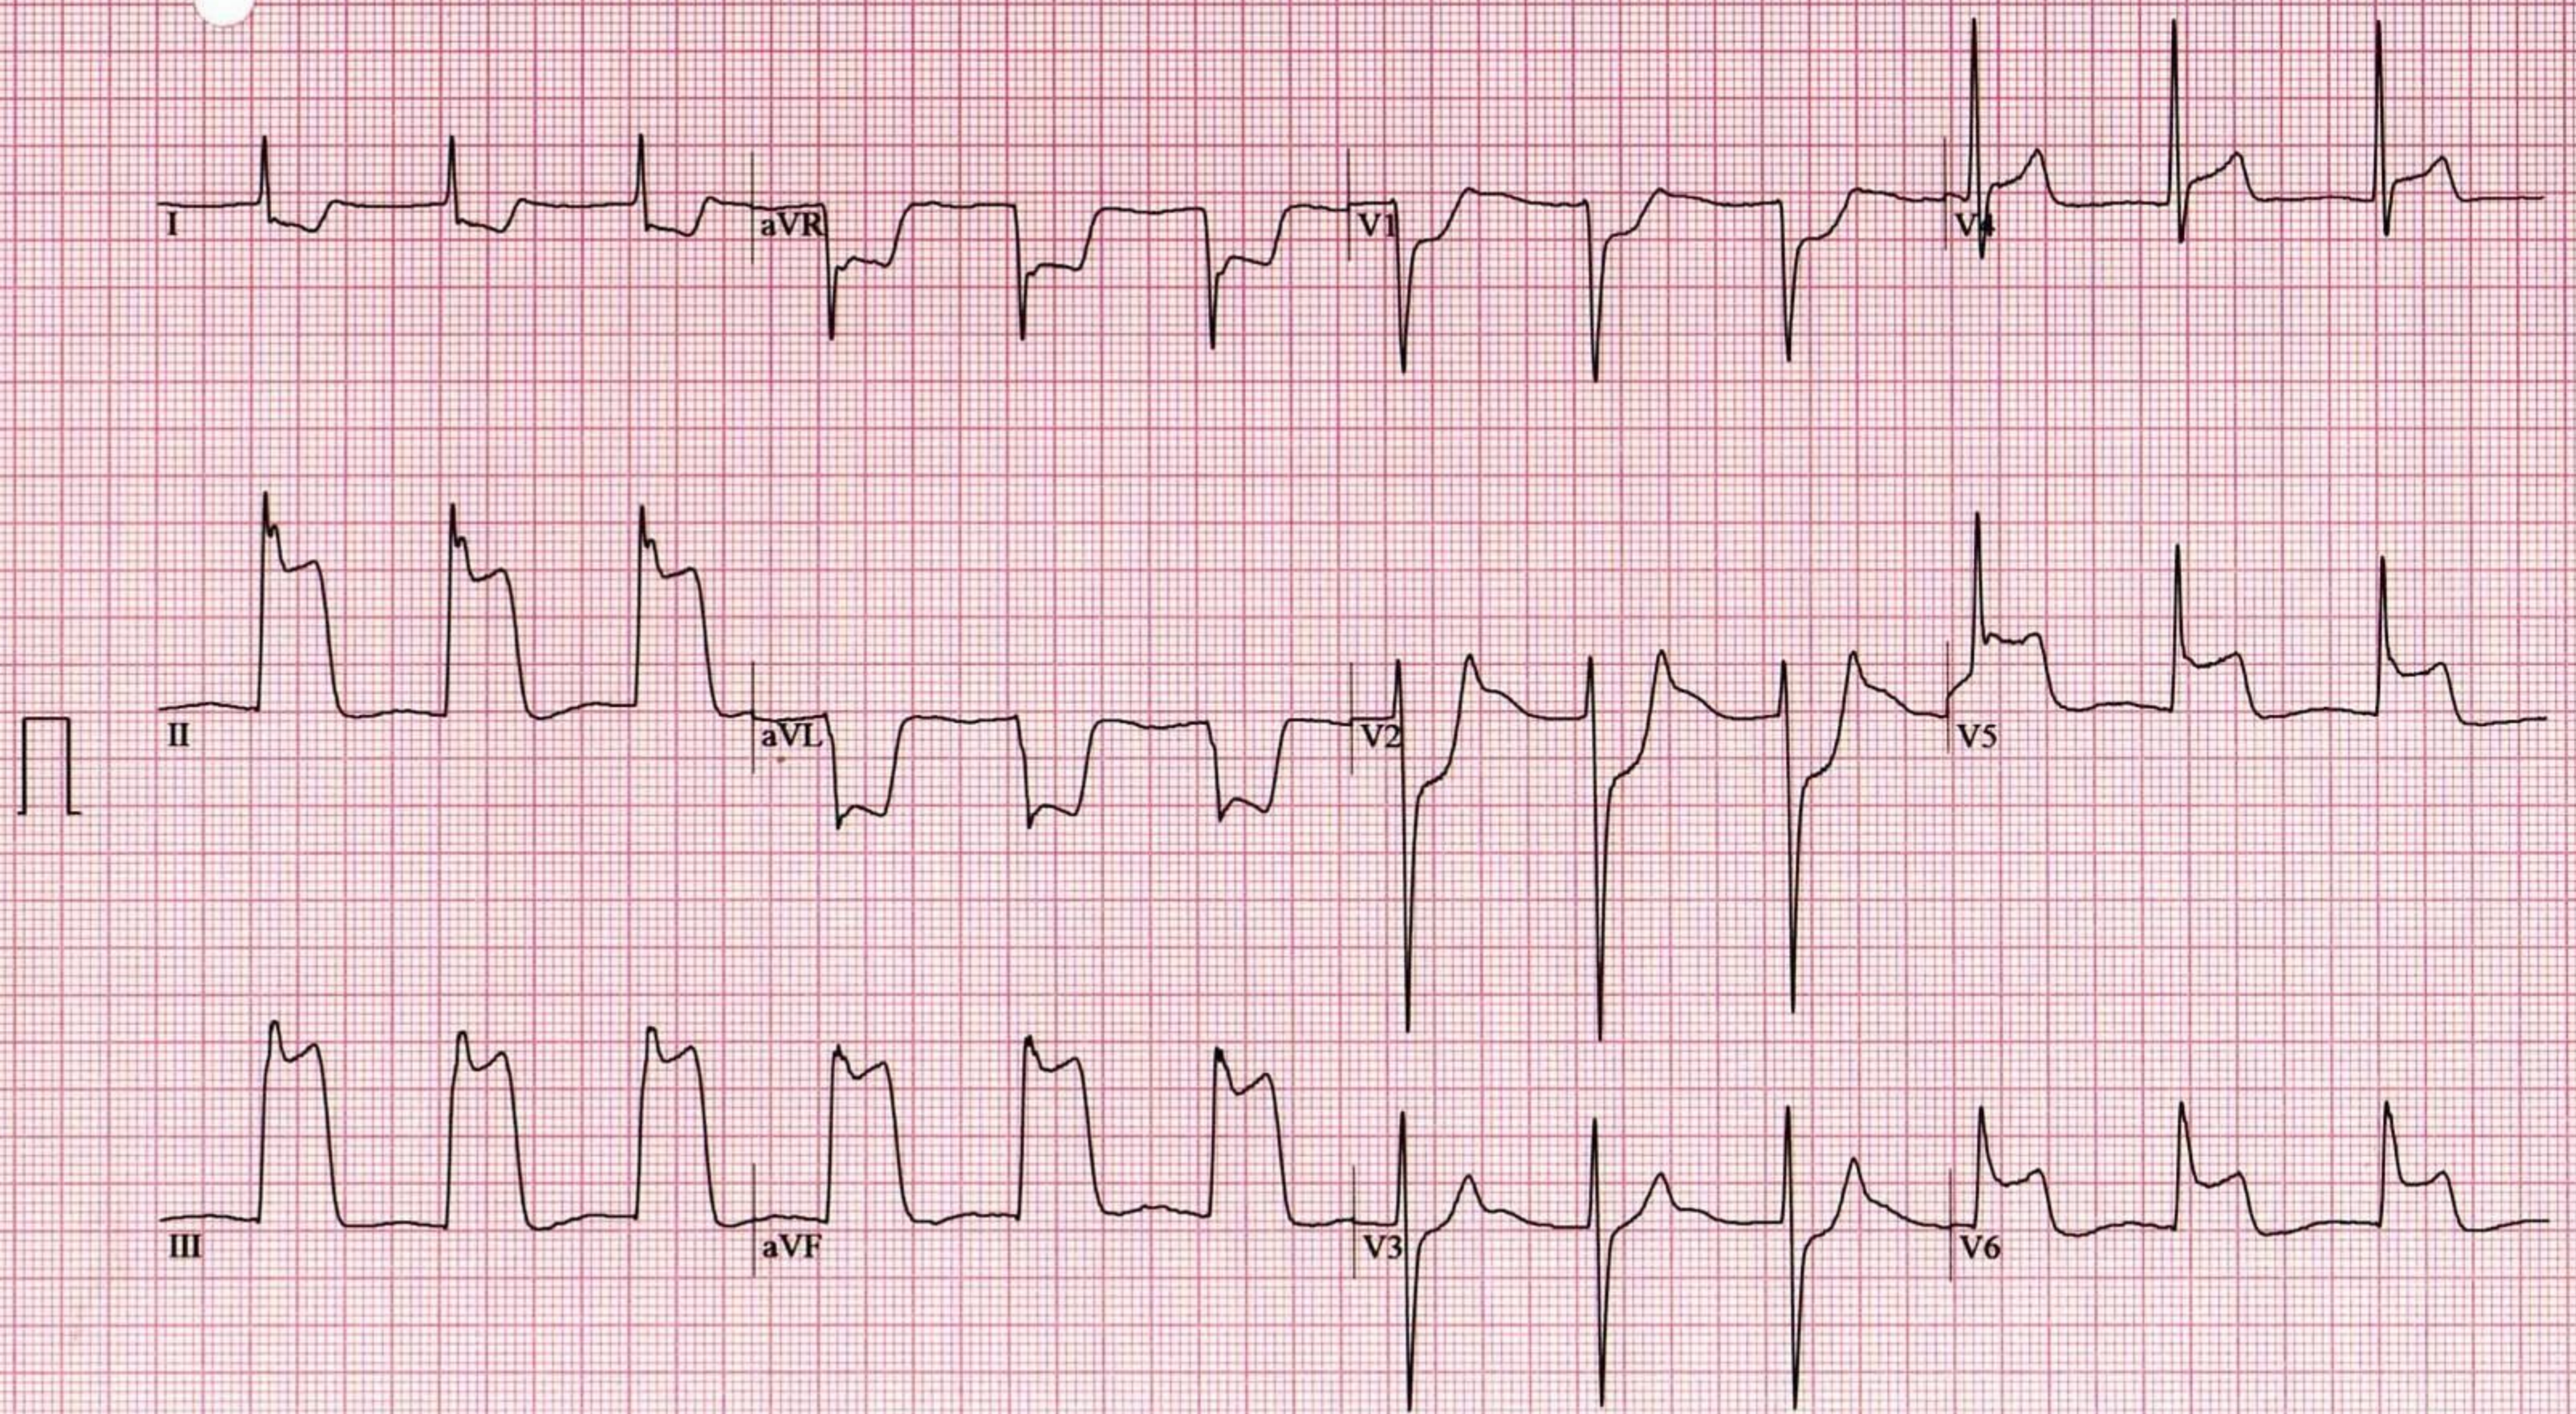

GE CASE V6.51 (0)  
25mm/s 10mm/mV 50Hz 0.01Hz FRF+ FC(V1,V2)

No confirmado

Página 1

a

72 bpm  
159/102 mmHg

RECUPER.  
6:03

BRUCE  
0.0 km/h  
0.0%

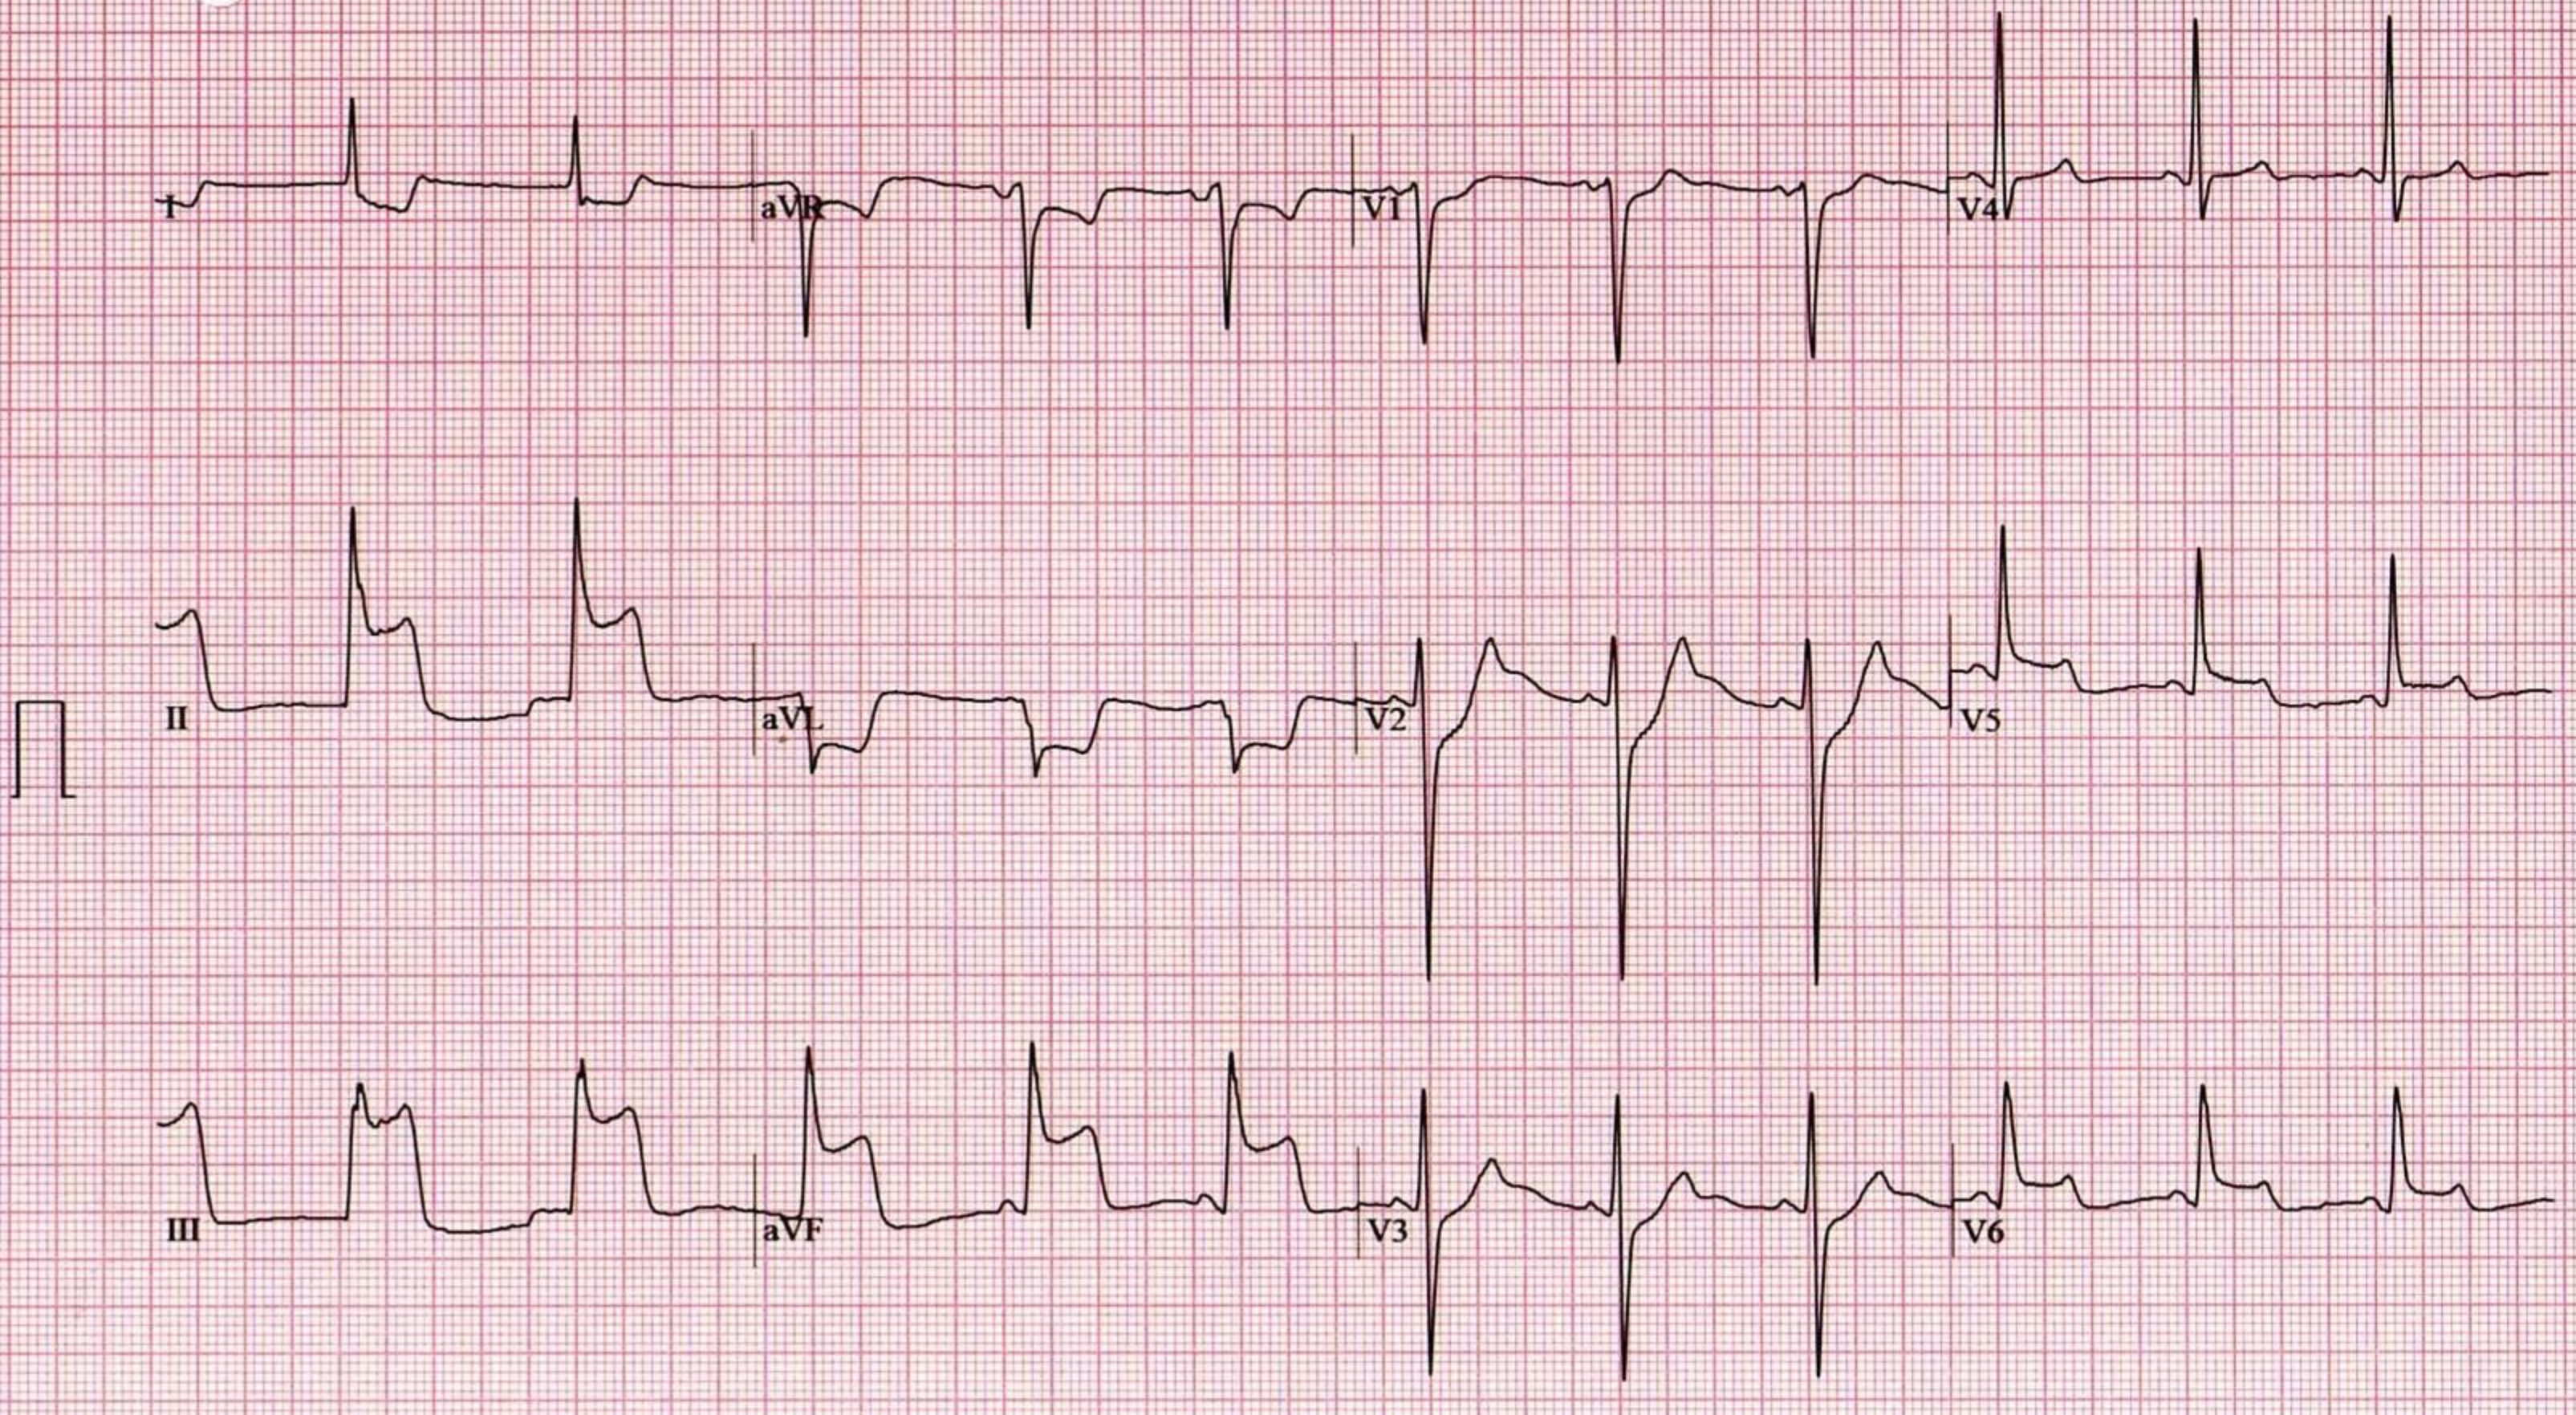

GE CASE V6.51 (0)  
25mm/s 10mm/mV 50Hz 0.01Hz FRF+ FC(V1,V2)

No confirmado

Página 1

b

89 bpm  
159/102 mmHg

RECUPER.  
6:48

BRUCE  
0.0 km/h  
0.0%

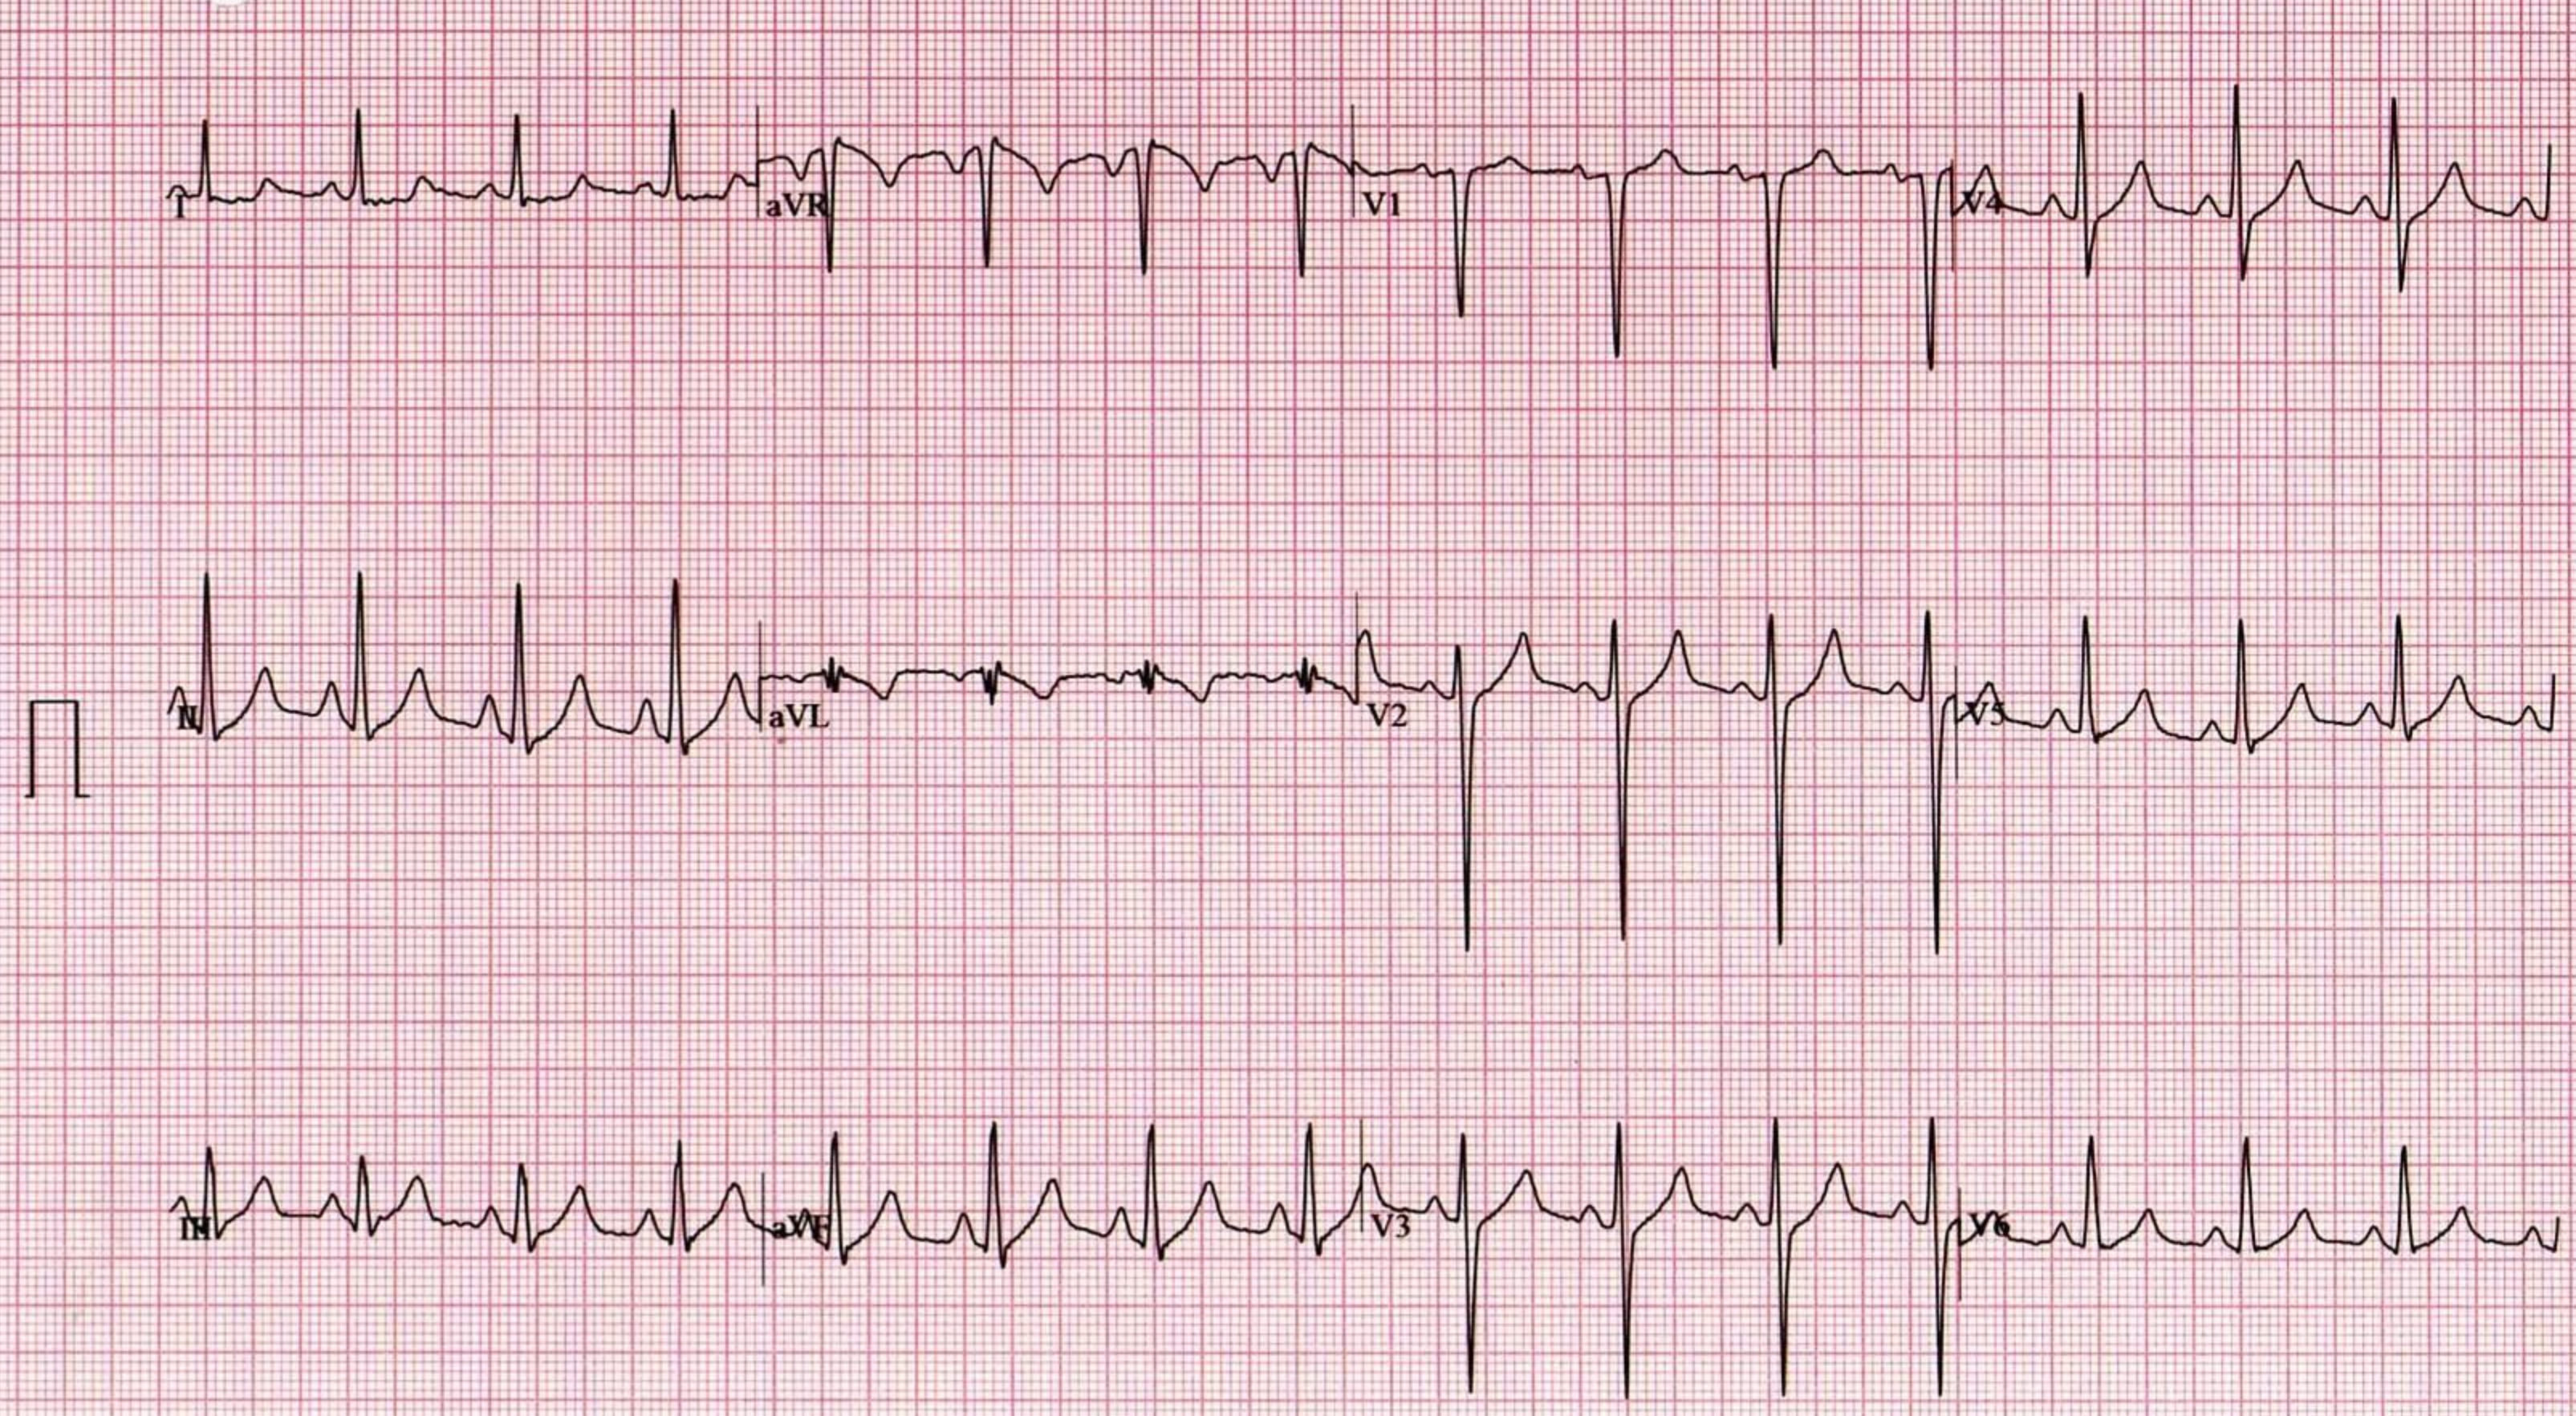

GE CASE V6.51 (0)  
25mm/s 10mm/mV 50Hz 0.01Hz FRF+ FC(V1,V2)

No confirmado

Página 1

c
